# Supplementary material for: Early Electroacupuncture Extends the rtPA Time Window to 6 h in a Male Rat Model of Embolic Stroke via the ERK1/2-MMP9 Pathway
Source: Hindawi journal article supplement (doi:10.1155/2020/8851089), 2020-11-11
Supplement: f1 [file 8851089.f1.docx]

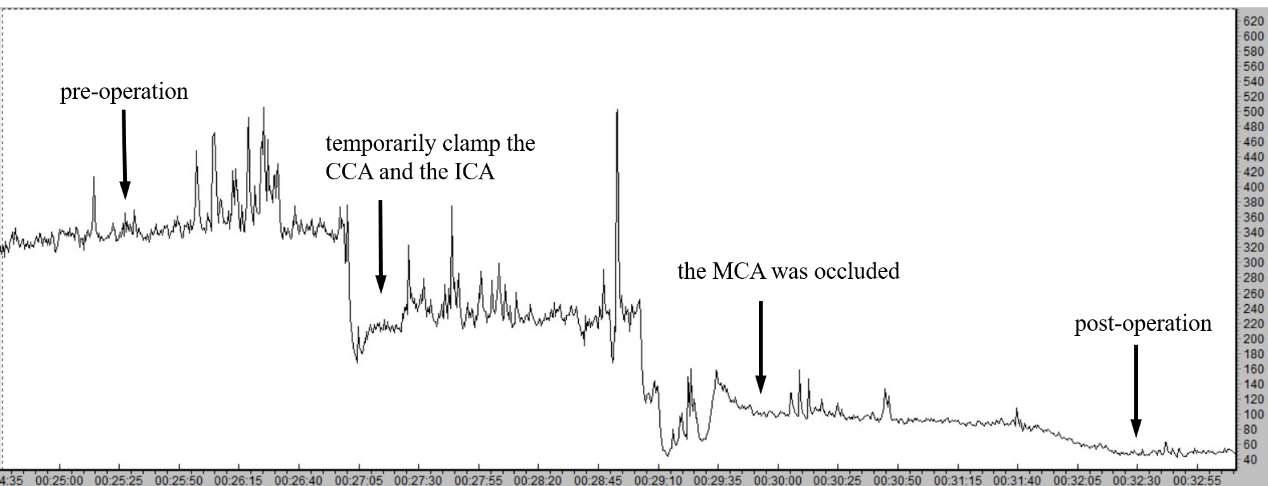


Supplementary Figure 1: Cerebral blood flow was monitored during the induction of embolic stroke model. The thrombus successfully obstructed CBF by a reduction in perfusion greater than 70% of baseline CBF.
